# Supplementary material
Source: Royal Society of Chemistry journal article supplement (doi:10.1039/d5cc07071f)
Supplement: d5cc07071f1.pdf [file d5cc07071f1.pdf]

## Supporting Information

# Strategic Alkene Incorporation into Peptide Backbones to Prevent Enzymatic Hydrolysis by Evading Molecular Recognition

Kohei Watanabe,<sup>a</sup> Yoshinori Taguchi,<sup>b</sup> Takuma Nishizawa,<sup>a</sup> Sayuri Takeo,<sup>b</sup> Chihiro Iio,<sup>b</sup> Nobuyuki Mase,<sup>a,c,d</sup> Kohei Sato,<sup>a,c,d</sup> and Tetsuo Narumi<sup>a,b,c,d\*</sup>

<sup>a</sup> Graduate School of Integrated Science and Technology, Shizuoka University, 3-5-1 Johoku, Hamamatsu, Shizuoka, Japan

<sup>b</sup> Graduate School of Medical Photonics, Shizuoka University, 3-5-1 Johoku, Hamamatsu, Shizuoka, Japan

<sup>c</sup> Department of Applied Chemistry and Biochemical Engineering, Faculty of Engineering, Shizuoka University, Shizuoka, Japan

<sup>d</sup> Research Institute of Green Science and Technology, Shizuoka University, 3-5-1 Johoku, Hamamatsu, Shizuoka, Japan

### Table of contents

|                                                                                                               |     |
|---------------------------------------------------------------------------------------------------------------|-----|
| 1. General information .....                                                                                  | S-2 |
| 2. Experimental procedures of alkene-type Ub mimics ( <b>4</b> and <b>7</b> ) and native Ub ( <b>9</b> )..... | S-3 |
| 3. Fluorescence polarization assay of <b>4</b> , <b>7</b> , and <b>8</b> .....                                | S-6 |
| 4. SDS-PAGE analysis of DUB-catalyzed hydrolysis reactions of <b>4</b> , <b>7</b> , and <b>8</b> .....        | S-7 |

## 1. General Information

### HPLC condition.

For HPLC separations, a Cosmosil 5C<sub>18</sub>-AR-II analytical column (Nacalai Tesque, 4.6 × 250 mm, flow rate 1.0 mL min<sup>-1</sup>), Cosmosil 5C<sub>18</sub>-AR-II preparative column (Nacalai Tesque, 20 × 250 mm, flow rate 10 mL min<sup>-1</sup>) was employed, and eluting products were detected by UV at 220 nm. A solvent system consisting of 0.1% TFA aqueous solution (v/v, solvent A) and 0.1% TFA in MeCN (v/v, solvent B) was used for HPLC elution.

### Characterization data.

High-resolution mass spectra were recorded on Bruker Daltonics compact (ESI-MS) spectrometers in the positive and negative detection mode.

## 2. Experimental procedures of protein

### (*E*)-Methylalkene-type Ub mimic (**4**):

On the Rink Amide ChemMatrix<sup>®</sup> resin (0.42 mmol/g loading), peptide was synthesized using standard Fmoc-based protocols (3.0 eq. each of amino acid containing Fmoc-Lys(Alloc)-OH using HATU (2.9 eq.) and DIPEA (3.0 eq.) in DMF (5 min) and Fmoc removal with 20% piperidine in DMF (5 min)). FITC was introduced at the *N*-terminus. Then, Pd(PPh<sub>3</sub>)<sub>4</sub> (0.25 eq.) and PhSiH<sub>3</sub> (20.0 eq.) was applied to remove the Alloc group and release the ε-amino group of Lys. The resulting resin was washed three times each with the following solvents: 0.5% (v/v) DIPEA in DCM, 0.02 M sodium diethyldithiocarbamate in DMF and DMF. Then, Ns-Gly-ψ[(*E*)-CMe=CH]-Gly-OH (**2**) was introduced under HATU/DIPEA system. The Ns group was removed by the thiolate generated from K<sub>2</sub>CO<sub>3</sub> (0.2 equiv.) in 5% (v/v) thiophenol/DMF for elongation. Note: To suppress the formation of aspartimide byproducts during solid-phase peptide synthesis, Fmoc-Gly(DMB)-OH was installed at the Gly53 residue. Then, the resin was washed with DMF×3, DCM×3, MeOH×3, Et<sub>2</sub>O×3, and dried under reduced pressure. Dried resin was cleaved using a TFA cocktail (TFA/*m*-cresol/thioanisole/3,6-dioxo-1,8-octanedithiol/H<sub>2</sub>O (85/5/5/2.5/2.5, (v/v))) at room temperature. After 2 h, cold Et<sub>2</sub>O was added to the reaction mixture to give a precipitate. The resulting precipitate was collected by centrifugation and thoroughly washed with Et<sub>2</sub>O to afford crude peptide. The crude peptide was purified by reversed-phase HPLC (25-45% solvent B over 90 min, 0.1% TFA, cosmosil 5C<sub>18</sub>-AR-II 20×250 mm column) followed by lyophilization to yield (*E*)-methylalkene-type Ub mimic (**4**) (1.05 μmol, 2% yield). Analytical HPLC, *t<sub>R</sub>* = 14.4 min (25-35% solvent B over 20 min); HRMS (ESI), Calcd for C<sub>410</sub>H<sub>660</sub>N<sub>109</sub>O<sub>123</sub>S<sub>2</sub> [M+H]<sup>+</sup> 9150, found 9150.

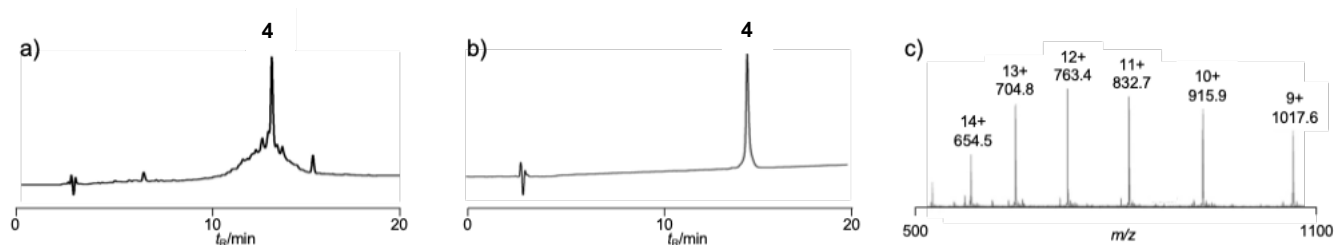

**Figure S1:** a) HPLC trace of crude material of **4**. b) HPLC trace of purified **4**. c) ESI-MS spectrum of purified **4**.

### (Z)-Chloroalkene-type Ub mimic (7):

On the Rink Amide ChemMatrix<sup>®</sup> resin (0.42 mmol/g loading), peptide was synthesized using standard Fmoc-based protocols (3.0 eq. each of amino acid containing Fmoc-Lys(Alloc)-OH using HATU (2.9 eq.) and DIPEA (3.0 eq.) in DMF (5 min) and Fmoc removal with 20% piperidine in DMF (5 min)). FITC was introduced at the *N*-terminus. Then, Pd(PPh<sub>3</sub>)<sub>4</sub> (0.25 eq.) and PhSiH<sub>3</sub> (20.0 eq.) was applied to remove the Alloc group and release the ε-NH<sub>2</sub> from Lys. The resulting resin was washed three times each with the following solvents: 0.5% (v/v) DIPEA in DCM, 0.02 M sodium diethyldithiocarbamate in DMF and DMF. After washing the resin, Fmoc-Gly-ψ[(*E*)-CCl=CH]-Gly-OH was conjugated by Fmoc-based protocols. Then, Fmoc removal with 20% piperidine in DMF (5 min)) for elongation of Fmoc-Amino acids of ubiquitin sequence. Note: To suppress the formation of aspartimide byproducts during solid-phase peptide synthesis, Fmoc-Gly(DMB)-OH was installed at the Gly53 residue. Then, the resin was washed with DMF×3, DCM×3, MeOH×3, Et<sub>2</sub>O×3, and dried under reduced pressure. Dried resin was cleaved using a TFA cocktail (TFA/*m*-cresol/Thioanisole/3,6-Dioxa-1,8-Octanedithiol/H<sub>2</sub>O (85/5/5/2.5/2.5, (v/v))) at room temperature. After 2 h, cold Et<sub>2</sub>O was added to the reaction mixture to give a precipitate. The formed precipitate was collected by centrifugation and thoroughly washed with Et<sub>2</sub>O to afford crude peptide. The crude peptide was purified by reversed-phase HPLC (25-45% solvent B over 90 min, 0.1% TFA, cosmosil 5C<sub>18</sub>-AR-II 20×250 mm column) followed by lyophilization to yield peptide **7** (1.20 μmol, 2% yield). Analytical HPLC, *t<sub>R</sub>* = 15.8 min (25-35% solvent B over 20 min); HRMS (ESI), Calcd for C<sub>409</sub>H<sub>657</sub>ClN<sub>109</sub>O<sub>123</sub>S<sub>2</sub> [M+H]<sup>+</sup> 9170, found 9170.

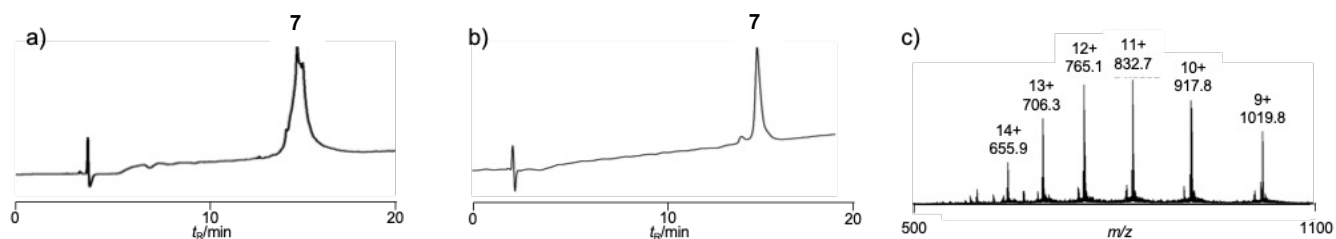

**Figure S2:** a) HPLC trace of crude material of **7**. b) HPLC trace of purified **7**. c) ESI-MS spectrum of purified **7**.

### Native-type ubiquitin (**8**):

On the Rink Amide ChemMatrix<sup>®</sup> resin (0.42 mmol/g loading), peptide was synthesized using standard Fmoc-based protocols (3.0 eq. each of amino acid containing Fmoc-Lys(Alloc)-OH using HATU (2.9 eq.) and DIPEA (3.0 eq.) in DMF (5 min) and Fmoc removal with 20% piperidine in DMF (5 min)). FITC was introduced at the *N*-terminus. Then, Pd(PPh<sub>3</sub>)<sub>4</sub> (0.25 eq.) and PhSiH<sub>3</sub> (20.0 eq.) was applied to remove the Alloc group and release the  $\epsilon$ -amino group of Lys. The resulting resin was washed three times each with the following solvents: 0.5% (v/v) DIPEA in DCM, 0.02 M sodium diethyldithiocarbamate in DMF and DMF. Then, Fmoc-Amino acids of ubiquitin sequence were elongated. Note: To suppress the formation of aspartimide byproducts during solid-phase peptide synthesis, Fmoc-Gly(DMB)-OH was installed at the Gly53 residue. The peptidyl resin was washed with DMF $\times$ 3, DCM $\times$ 3, MeOH $\times$ 3, Et<sub>2</sub>O $\times$ 3, and dried under reduced pressure. Dried resin was cleaved using a TFA cocktail (TFA/*m*-cresol/Thioanisole/3,6-Dioxo-1,8-Octanedithiol/H<sub>2</sub>O (85/5/5/2.5/2.5, (v/v))) at room temperature. After 2 h, cold Et<sub>2</sub>O was added to the reaction mixture to give a precipitate. The formed precipitate was collected by centrifugation and thoroughly washed with Et<sub>2</sub>O to afford crude peptide. The crude peptide was purified by reversed-phase HPLC (25-45% solvent B over 90 min, 0.1% TFA, cosmosil 5C<sub>18</sub>-AR-II 20 $\times$ 250 mm column) followed by lyophilization to yield peptide **8** (1.05  $\mu$ mol, 2% yield). Analytical HPLC,  $t_R$  = 16.8 min (25-35% solvent B over 20 min); HRMS (ESI), Calcd for C<sub>408</sub>H<sub>657</sub>N<sub>110</sub>O<sub>124</sub>S<sub>2</sub> [M+H]<sup>+</sup> 9153, found 9153.

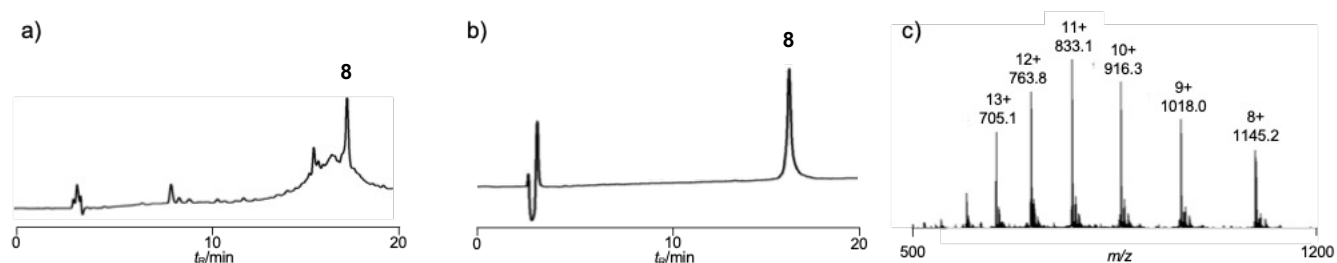

**Figure S3:** a) HPLC trace of crude material of **8**. b) HPLC trace of purified **8**. c) ESI-MS spectrum of purified **8**.

### 3. Fluorescence polarization (FP) measurements

We examined the stability of the (*E*)-methylalkene-type Ub mimic (**4**) and (*Z*)-chloroalkene-type Ub mimic (**7**) to enzymatic hydrolysis through the fluorescence polarization (FP) technique. The solution of 5-FAM-labeled Ub derivatives (50  $\mu$ L, 1 mg/mL in PBS each) were added on a 96-well plate. After addition of a buffer (39  $\mu$ L, 50 mM Tris, 50 mM NaCl, 2 mM dithiothreitol (pH 8.0)), Usp2cc (11  $\mu$ L, 0.9 mg/mL in 50 mM Tris/HCl (pH7.5), 100 mM NaCl, 10% Glycerol) was added to the well. The resulting plate was immediately set to a microplate reader (Infinite 200 PRO, Tecan, Switzerland) equipped with 485 nm excitation and 535 nm emission filters, and the FP measurements were carried out every 1 min for 60 min at 37  $^{\circ}$ C.

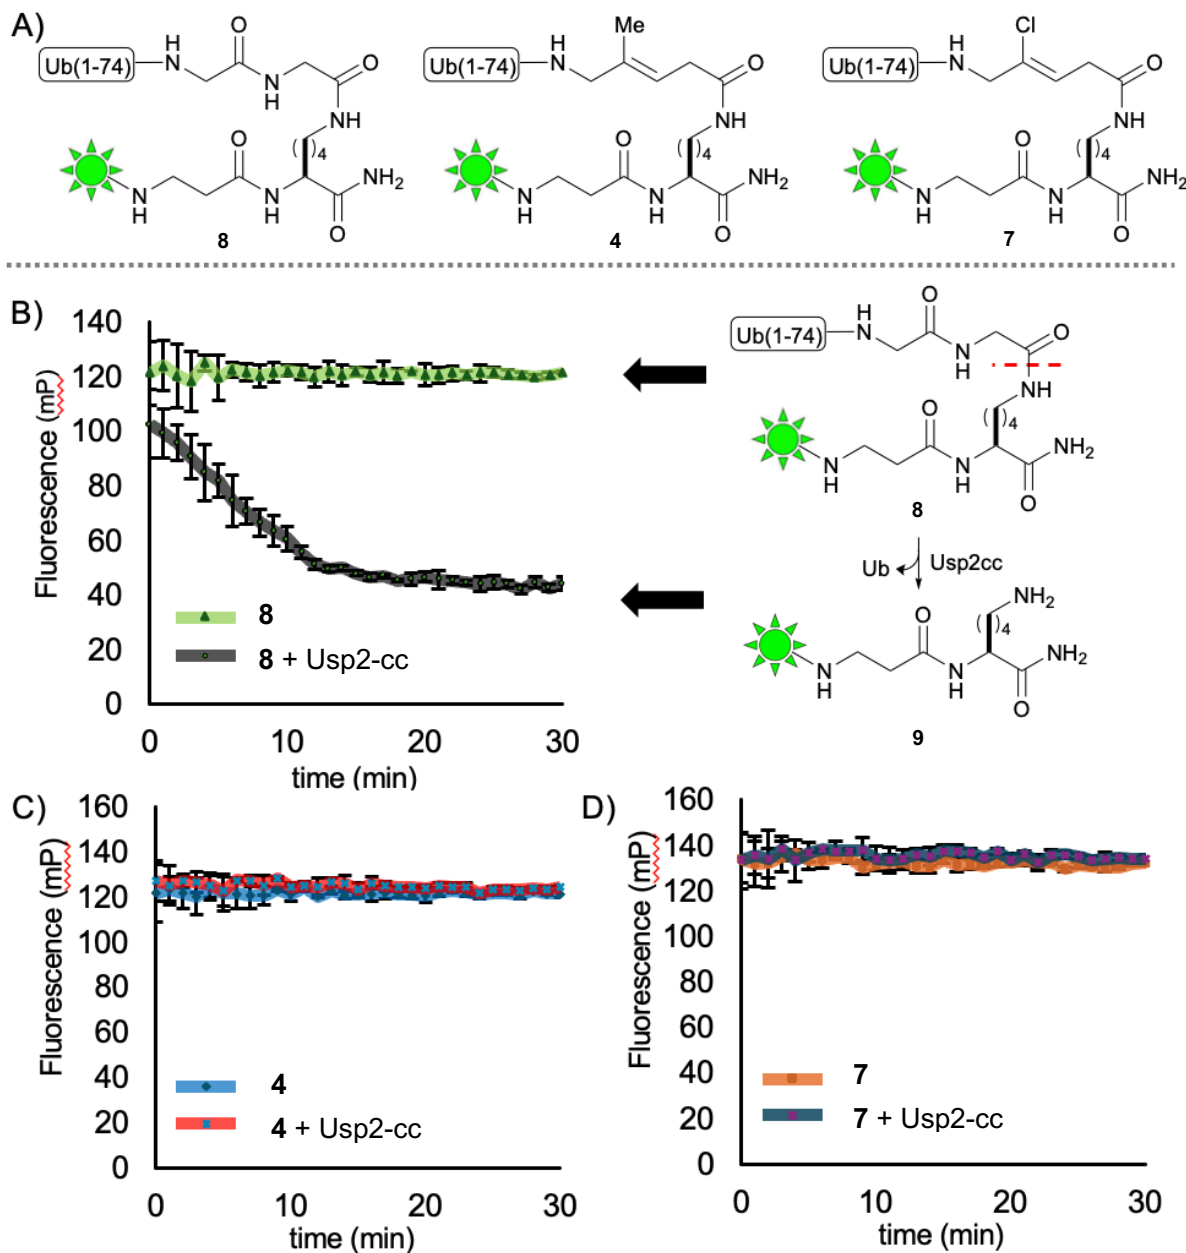

**Figure S4** A) Native type Ub **8**, Methylalkene-type Ub **4** and Chloroalkene-type Ub **7**. B) Reaction time course of FP assays with **8** and alkene mimics, C) **4**, and D) **7**.

### SDS-PAGE

Proteins denatured in 1× NuPAGE LDS sample buffer (Thermo Fisher Scientific) were heated at 70 °C for 10 min and, then separated by SDS-PAGE on 4–12% NuPAGE Bis-Tris gels (Invitrogen) with NuPAGE™ MES SDS Running buffer at 150 V for 45 min. The gels were stained with Coomassie Brilliant Blue (CBB).

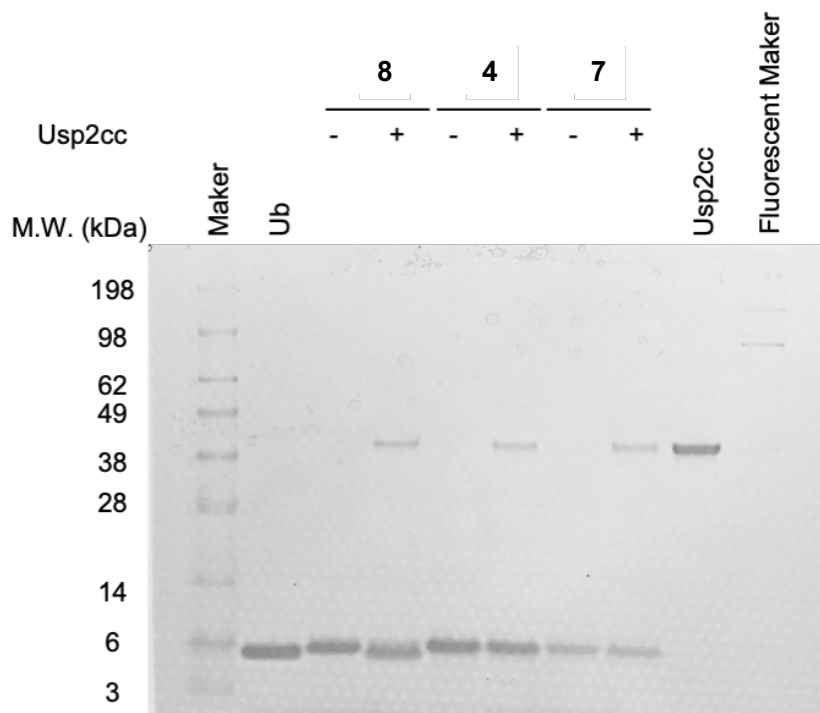

**Figure S5** Hydrolysis of Native type Ub **8**, Methylalkene-type Ub **4** and Chloroalkene-type Ub **7** using Usp2cc were analyzed by SDS-PAGE.
